# Supplementary material
Source: Springer Nature journal article supplement (https://www.springermedizin.de/resource/supplementary/13063_2013_1466_MOESM5_ESM.pdf/9620072)
Supplement: MOESM5 [file 9620072]

# ADAPT HER2+/HR-

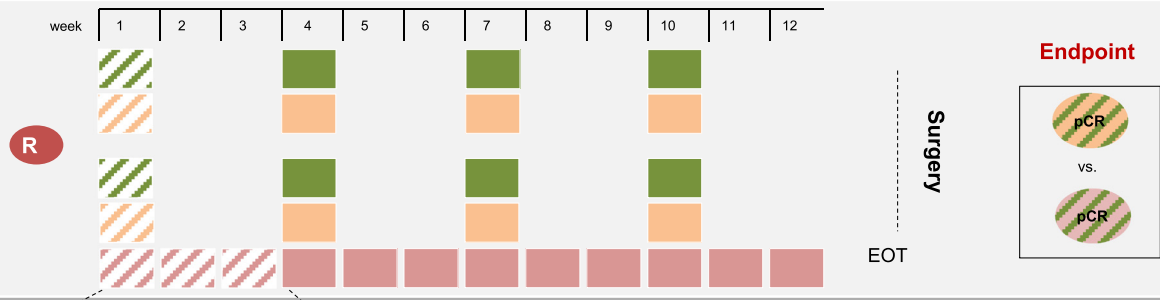

## ADAPT Umbrella

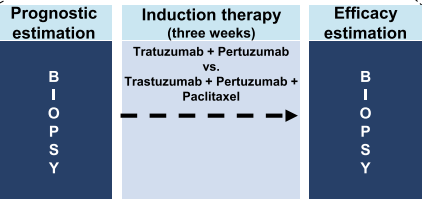

-  Trastuzumab  
Loading 8 mg/kg  
Preservation 6 mg/kg
-  Pertuzumab  
Loading 840 mg  
Preservation 420 mg
-  Paclitaxel  
80 mg/m<sup>2</sup>
